# Supplementary material
Source: PubMed Central journal article supplement (PMC8688171)
Supplement: NIHMS1722512-supplement-supinfo.pdf [file NIHMS1722512-supplement-supinfo.pdf]

**Adherence to a healthy sleep pattern is associated with lower risks of all-cause, cardiovascular and cancer-specific mortality**

Tao Zhou<sup>1,2</sup>, Yu Yuan<sup>3</sup>, Qiaochu Xue<sup>2</sup>, Xiang Li<sup>2</sup>, Mengying Wang<sup>2,4</sup>, Hao Ma<sup>2</sup>, Yoriko Heianza<sup>2</sup>, Lu Qi<sup>2,5\*</sup>

<sup>1</sup>School of Public Health (Shenzhen), Sun Yat-sen University, Guangzhou, Guangdong 510006, China

<sup>2</sup>Department of Epidemiology, School of Public Health and Tropical Medicine, Tulane University, New Orleans, LA

<sup>3</sup>Department of Occupational and Environmental Health, Key Laboratory of Environment and Health, Ministry of Education and State Key Laboratory of Environmental Health (Incubating), School of Public Health, Tongji Medical College, Huazhong University of Science and Technology, Wuhan, China

<sup>4</sup>Department of Epidemiology and Biostatistics, School of Public Health, Peking University Health Science Center, Beijing, China

<sup>5</sup>Department of Nutrition, Harvard TH Chan School of Public Health, Boston, MA

\*Corresponding author and person to whom reprint requests should be addressed:

Dr. Lu Qi, Department of Epidemiology, School of Public Health and Tropical Medicine, Tulane University, 1440 Canal Street, Suite 1724, New Orleans, LA 70112; Telephone: 504-988-3549; Fax: 504-988-1568; E-mail address: lqi1@tulane.edu.

**Supplementary Table 1** Multivariable-adjusted HRs (95% CIs) for Cancer, CVD and all-cause mortality by low-risk sleep factors

| Sleep factors                   | N (%)         | Mortality         |                   |                   |
|---------------------------------|---------------|-------------------|-------------------|-------------------|
|                                 |               | Cancer            | CVD               | All-cause         |
| Healthy sleep score             | 62892 (22.2)  | 0.96 (0.93, 0.99) | 0.89 (0.83, 0.95) | 0.94 (0.92, 0.96) |
| Early chronotype                | 178160 (62.9) | 0.91 (0.86, 0.97) | 0.92 (0.79, 1.06) | 0.90 (0.86, 0.94) |
| Sleep 7-8 h/d                   | 197246 (69.6) | 0.90 (0.84, 0.96) | 0.78 (0.68, 0.91) | 0.83 (0.79, 0.86) |
| Insomnia (never/rare+sometimes) | 209507 (73.9) | 0.96 (0.90, 1.03) | 0.99 (0.84, 1.16) | 0.91 (0.87, 0.96) |
| No frequent daytime sleepiness  | 276585 (97.6) | 0.95 (0.80, 1.13) | 0.70 (0.49, 0.99) | 0.77 (0.69, 0.86) |
| No snoring                      | 178022 (62.8) | 1.06 (1.00, 1.13) | 0.88 (0.76, 1.02) | 1.13 (1.08, 1.18) |

Data were adjusted for age, sex, assessment centers, smoking status, alcohol intake status, socioeconomic status, and physical activity

## Supplementary figures

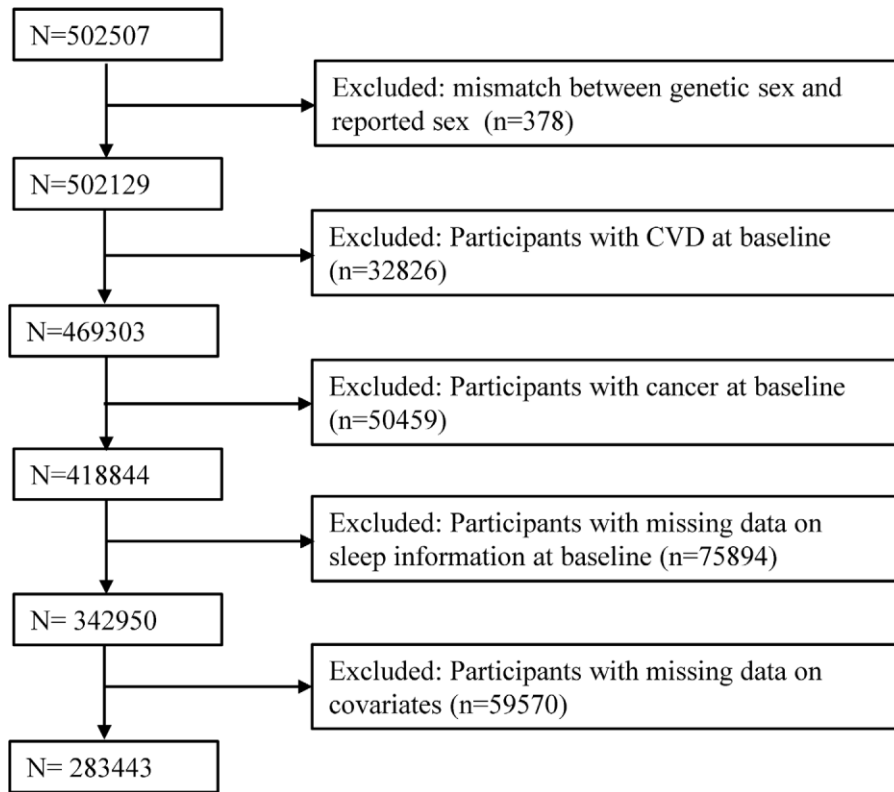

**Supplementary fig.1** Flow chart for the UK Biobank participants who were included in the analysis.

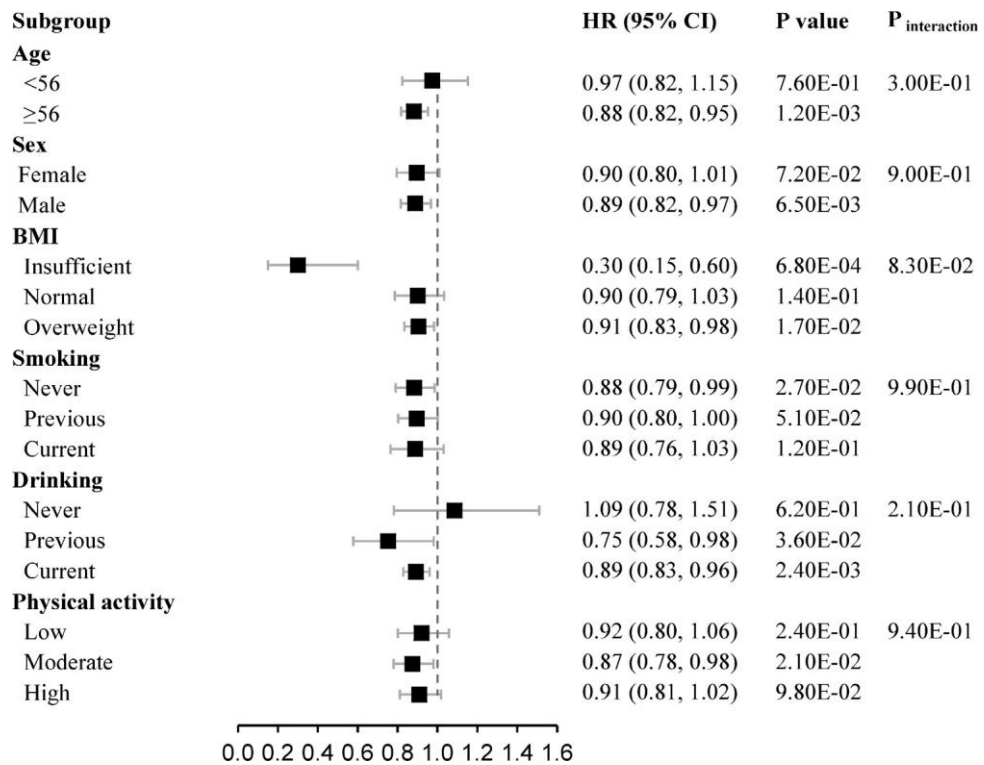

**Supplementary fig.2** Hazard Ratios for death from cardiovascular events in subgroups. Data was adjusted for age, sex, assessment centers, smoking status, alcohol intake status, socioeconomic status, and physical activity.

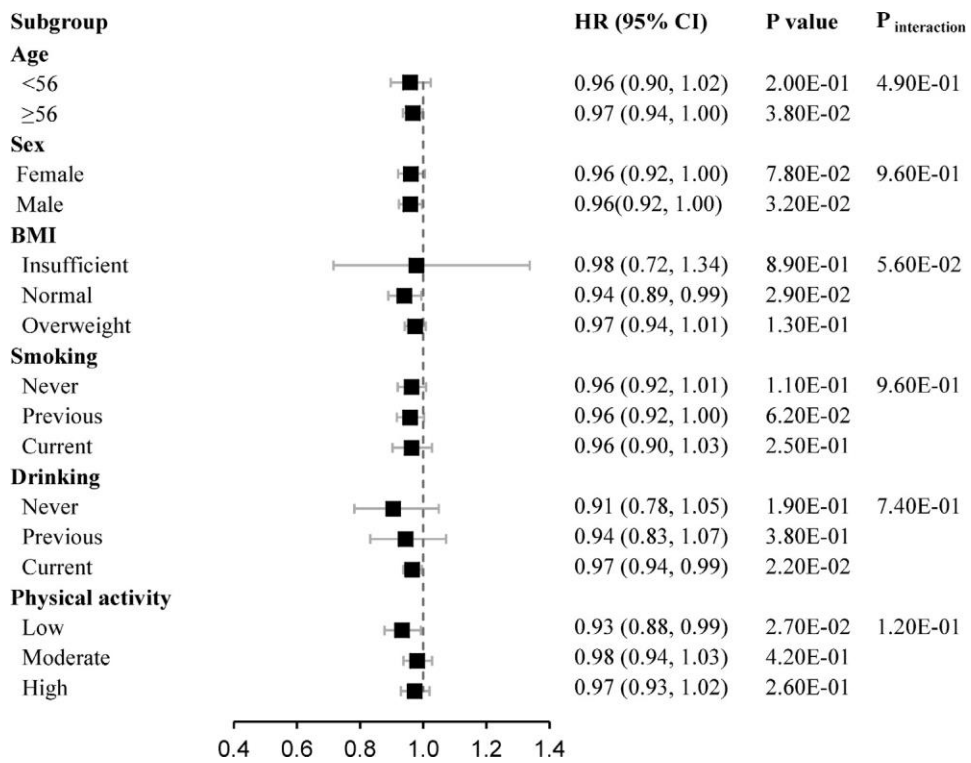

**Supplementary fig.3** Hazard Ratios for death from cancer in subgroups. Data was adjusted for age, sex, assessment centers, smoking status, alcohol intake status, socioeconomic status, and physical activity.
